# Supplementary material for: A nano-frost array technique to prepare nanoporous PVDF membranes
Source: Royal Society of Chemistry journal article supplement (doi:10.1039/c4nr00951g), 2014-01-01
Supplement: c4nr00951g1.pdf [file c4nr00951g1.pdf]

**Supporting Information:**

**Nano-frost Array Technique to Prepare  
Nanoporous PVDF Membranes**

Min Kyung Lee and Jonghwi Lee\*

(E-mail): [jong@cau.ac.kr](mailto:jong@cau.ac.kr)

| <b>Solvent</b>                      | <b>Water</b> | <b>Dimethylacetamide (DMAc)</b> |
|-------------------------------------|--------------|---------------------------------|
| Density (g/cm <sup>3</sup> )        | 1.00         | 0.94                            |
| Boiling point (°C)                  | 100.0        | 165.0                           |
| Melting point (°C)                  | 0.0          | -20.0                           |
| Enthalpy of vaporization (kJ/mol)   | 44.23        | 53.2                            |
| Contact angle on an alumina surface | 4.6°         | 15°                             |
| Surface energy (dyn/cm)             | 72.8         | 32.43                           |

**Table S1.** Properties of the solvents.

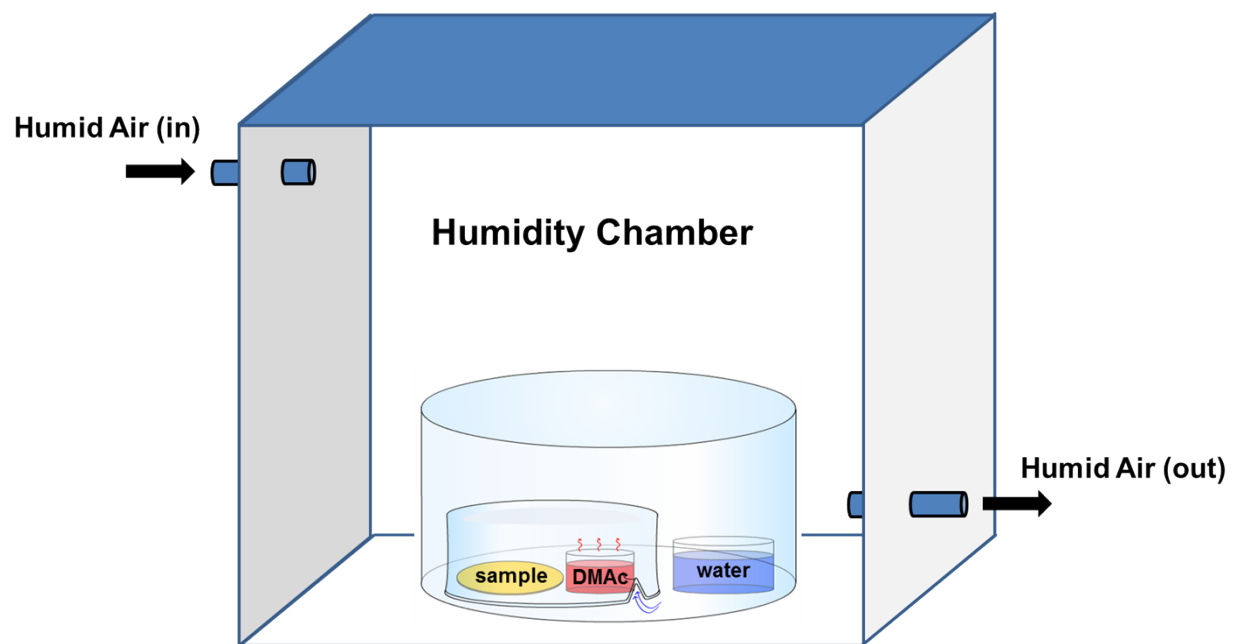

**Figure S1.** Schematic illustration of the co-solvent annealing chamber.

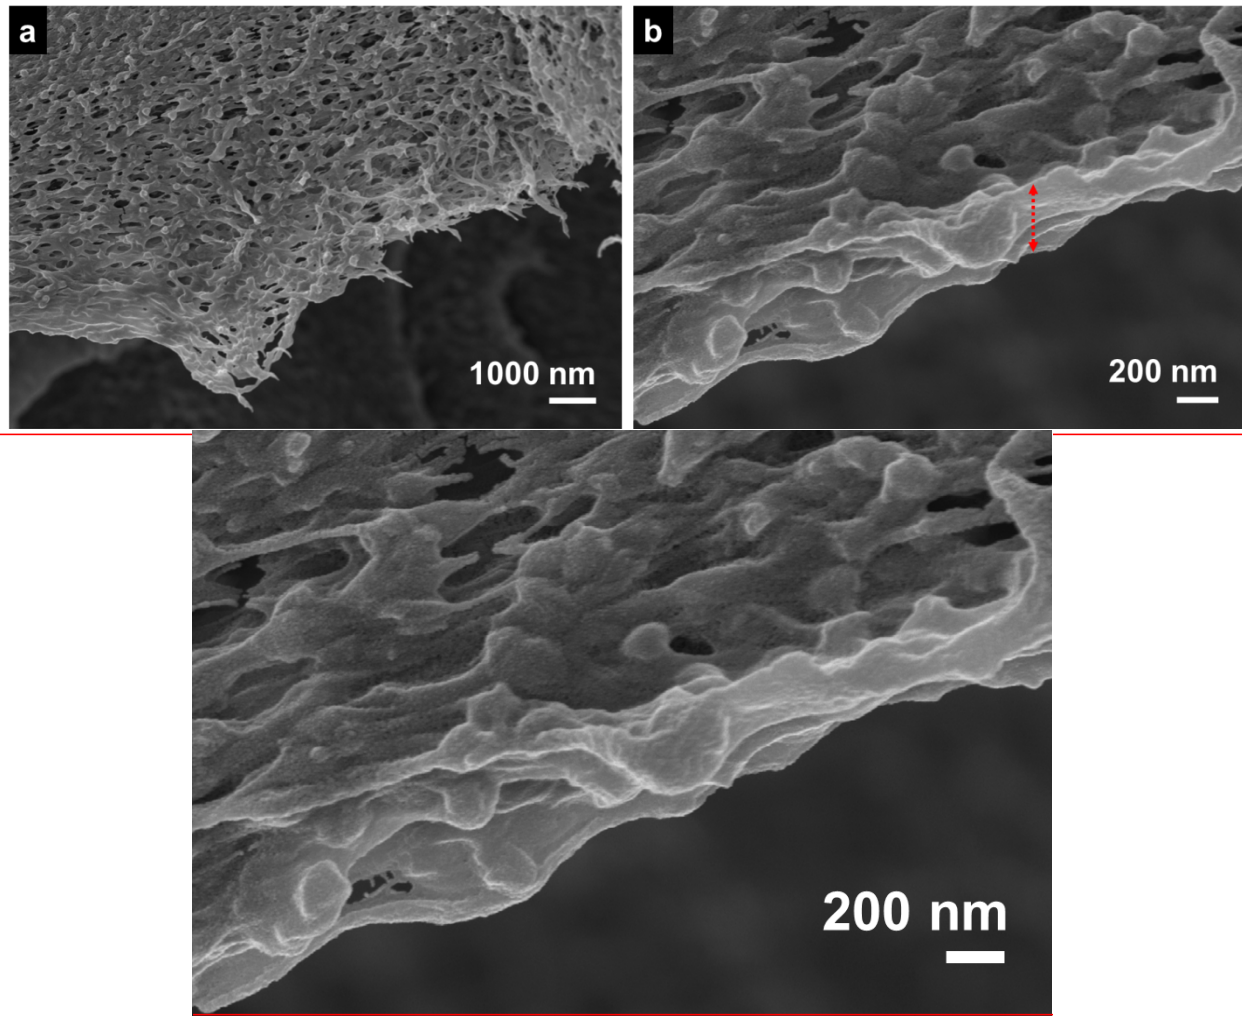

**Figure S2.** (a) Top-view SEM image of the PVDF nanomembrane. (b) Tilted view ( $q = 60^\circ$ ) with high magnification of (a). The red arrow indicates the thickness of nanomembrane. Cross-sectional SEM image of the PVDF nanomembrane.

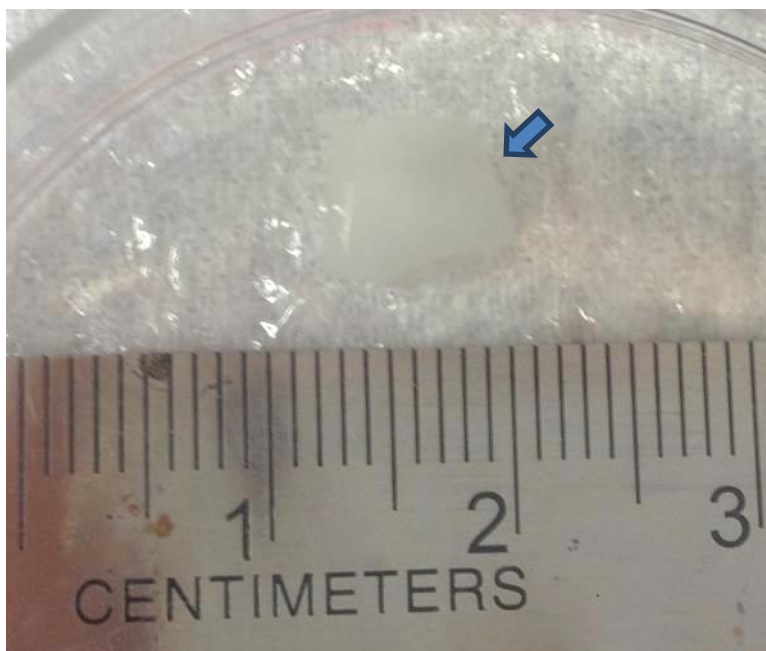

**Figure S3.** Digital picture of a freely suspended PVDF nanomembrane (5 x 5 mm) floating on a water surface.

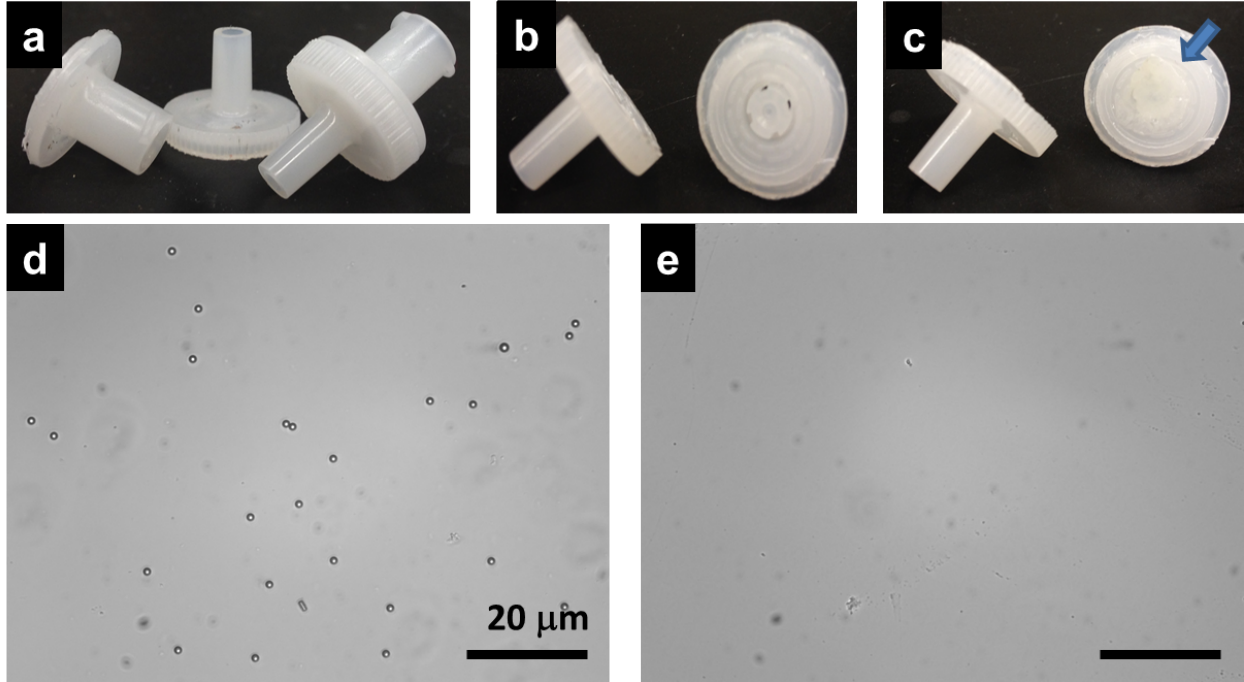

**Figure S4.** Digital pictures of (a) the filter modules used for separation test, (b) before / (c) after mounting samples on a module. Optical images of (d) the feed polystyrene microspheres with particle sizes of 2 μm and (e) the filtrates after filtration by a nanomembrane.

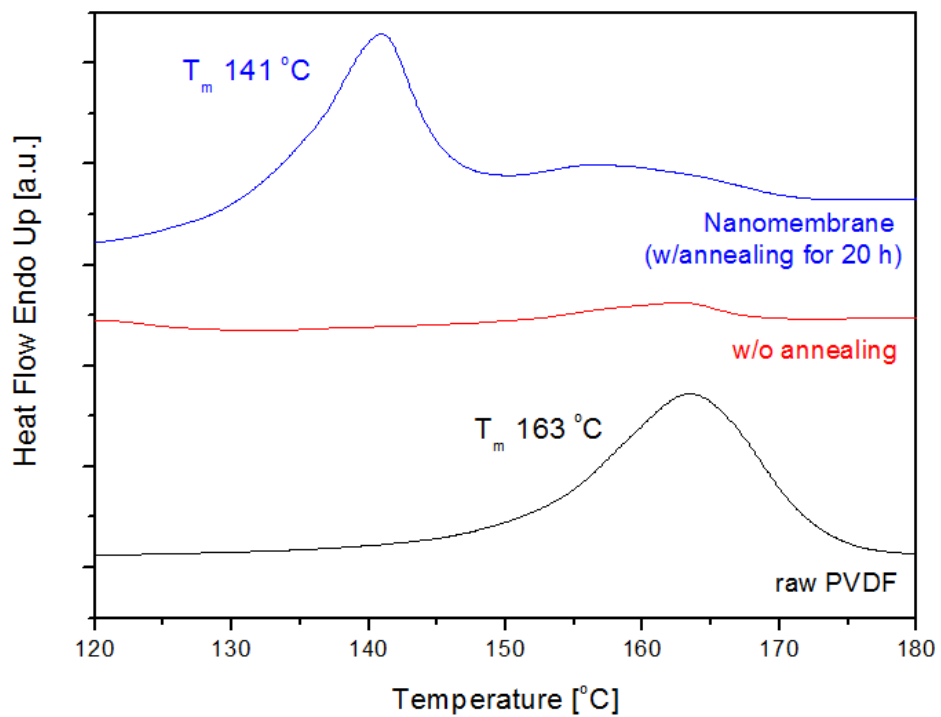

**Figure S5.** DSC curves for raw PVDF and PVDF nanostructures prepared under different conditions (with annealing and without annealing).
